# Supplementary material
Source: PubMed Central journal article supplement (PMC5778891)

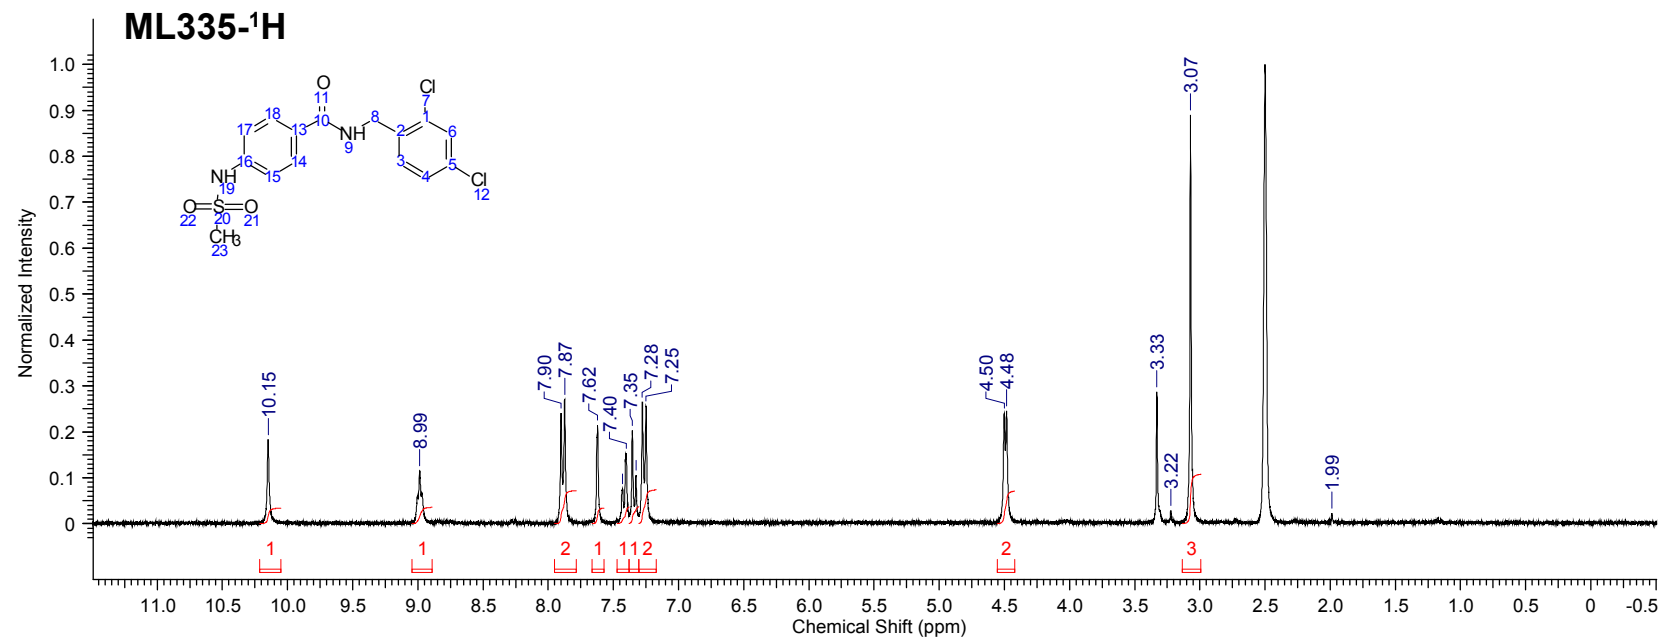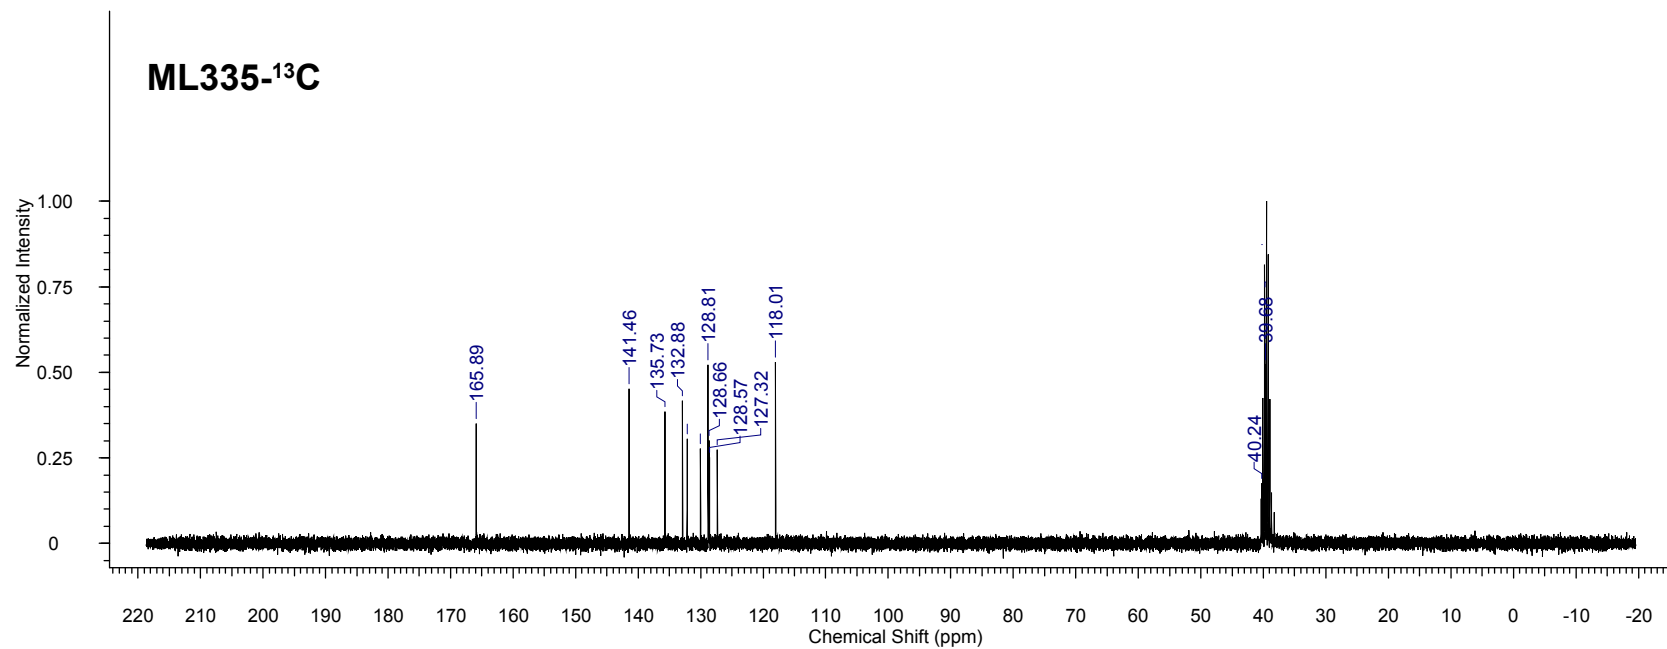

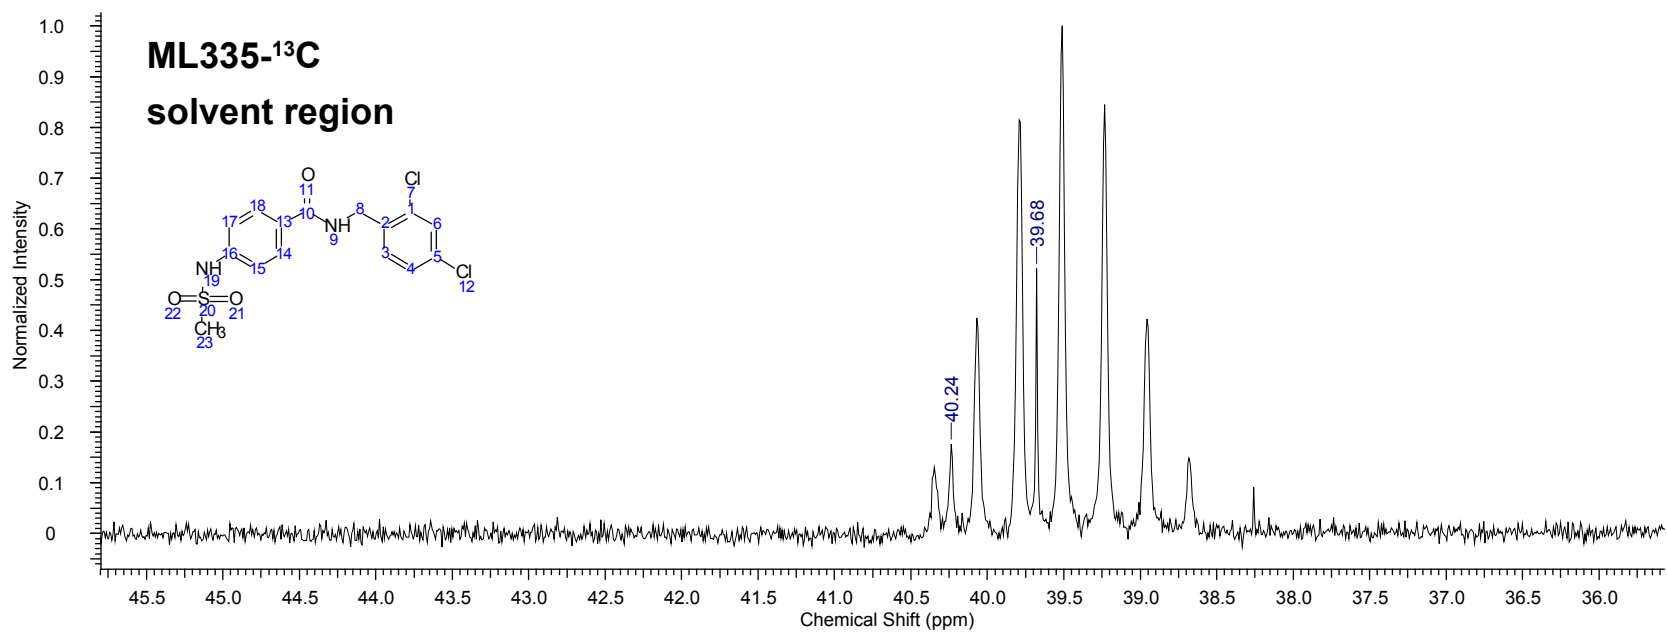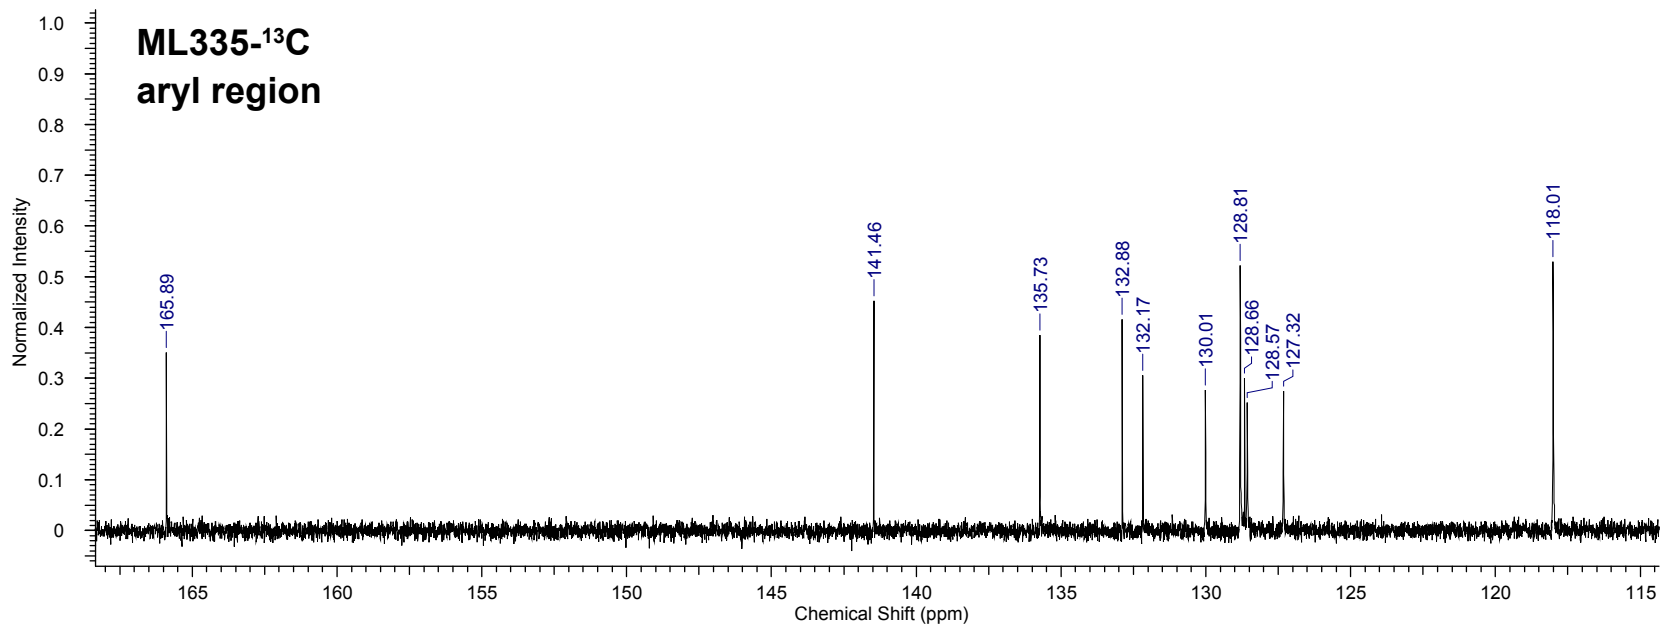

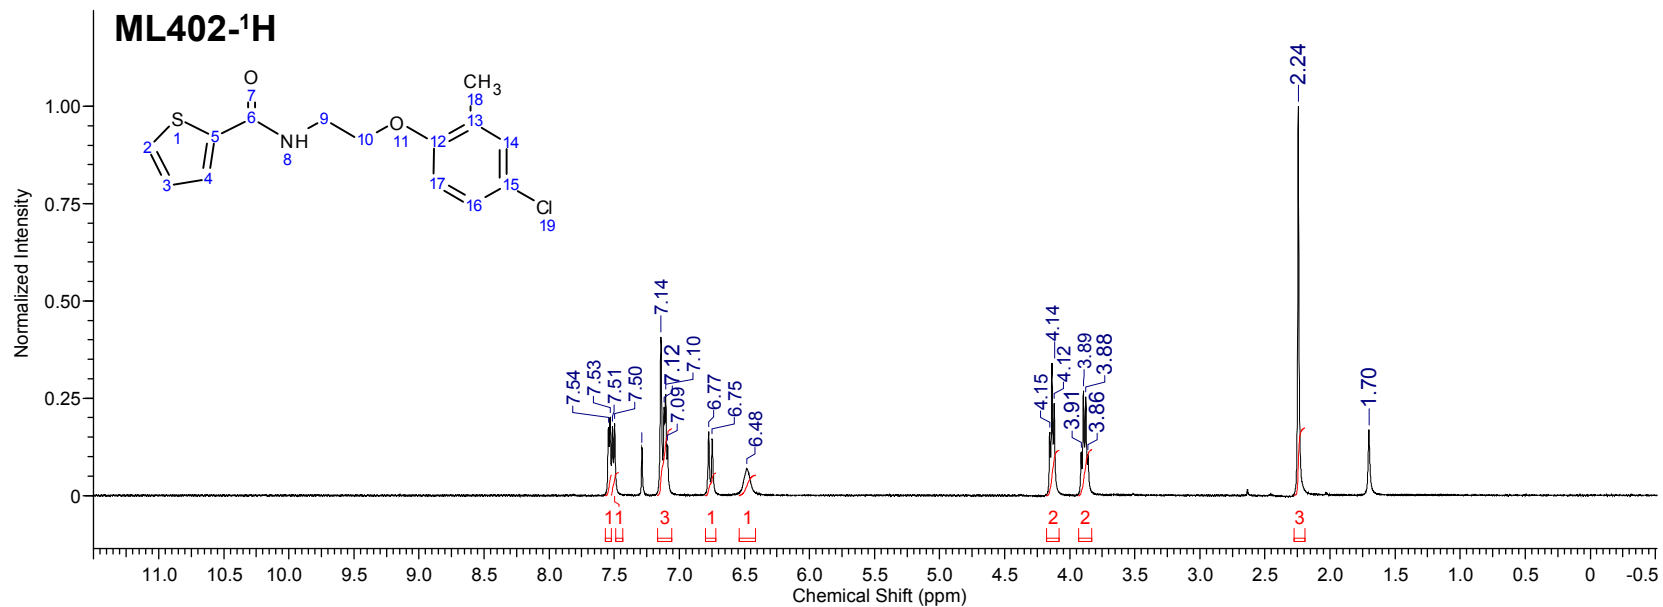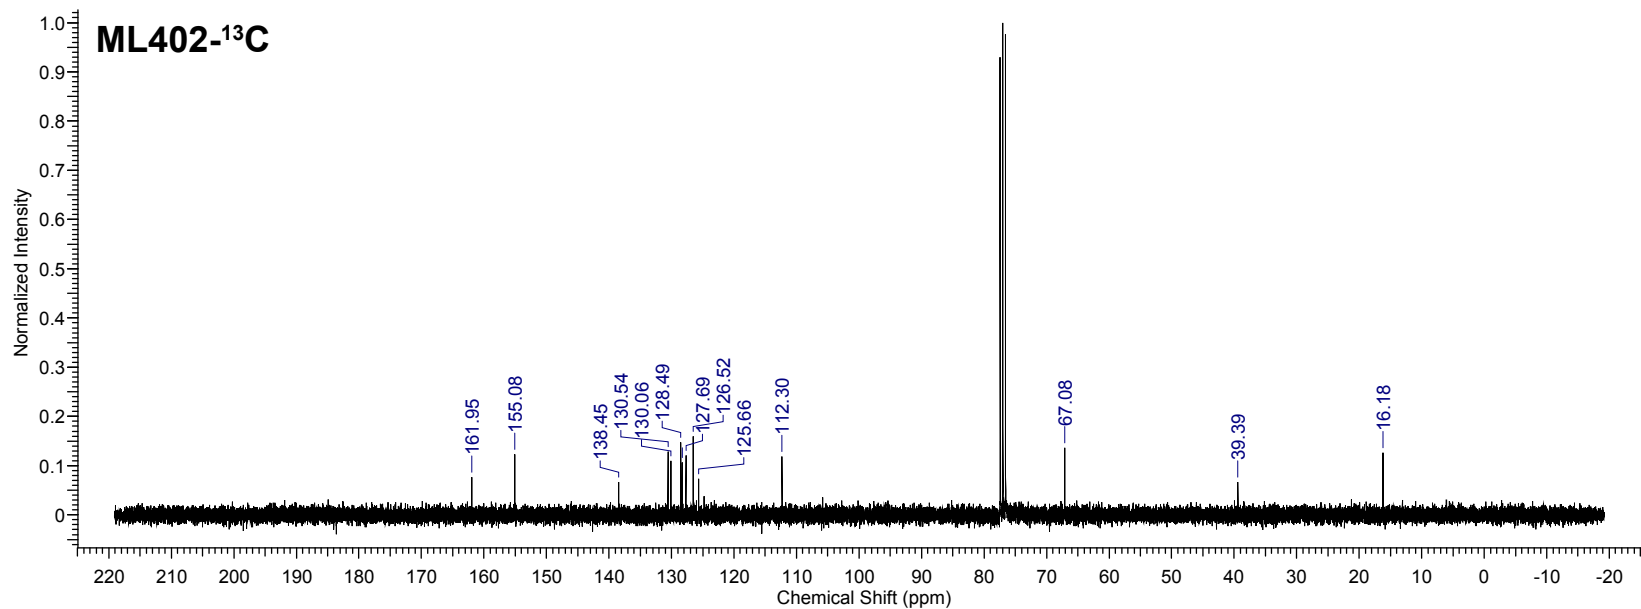

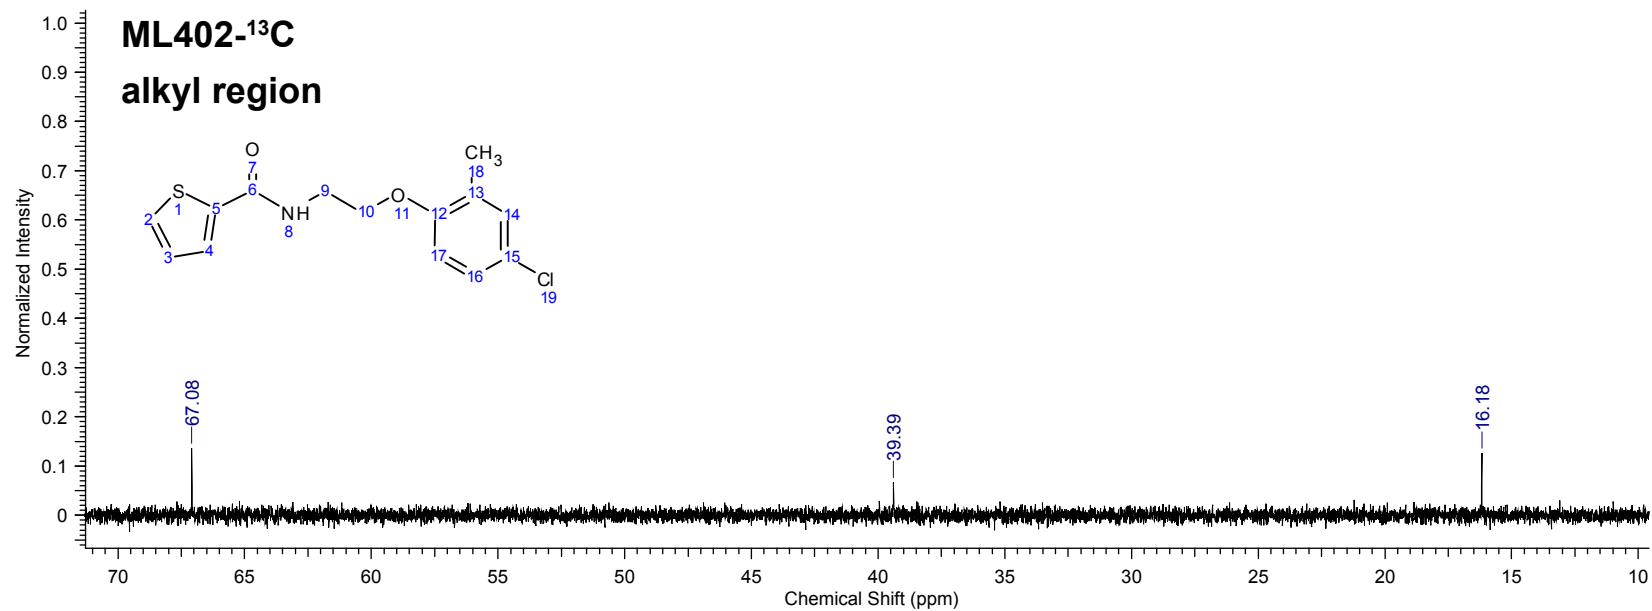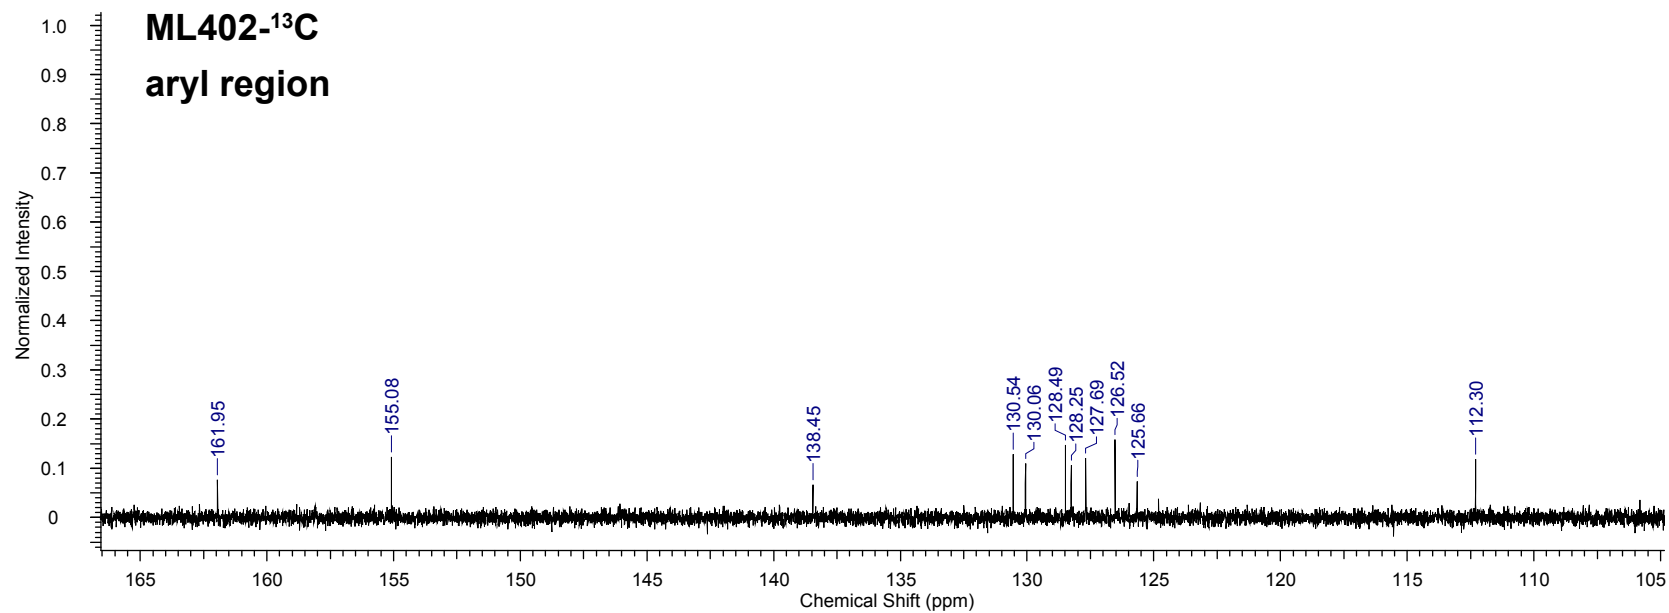

### ML335a-<sup>1</sup>H

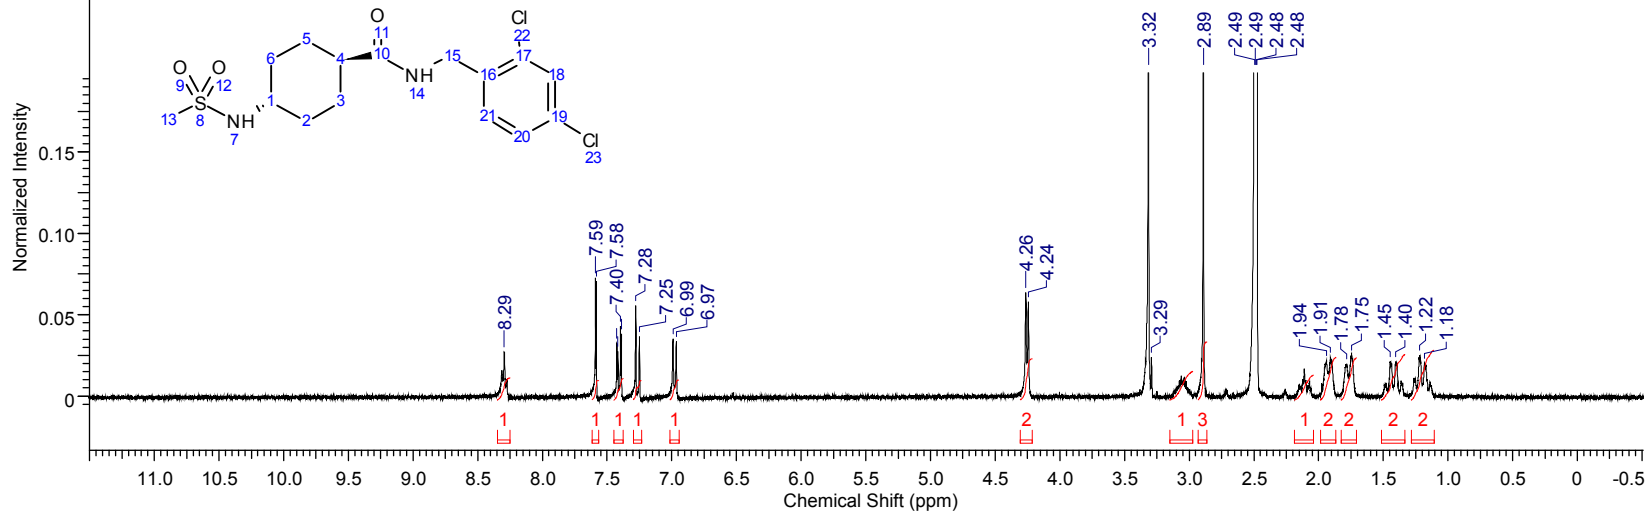

### ML335a-<sup>13</sup>C

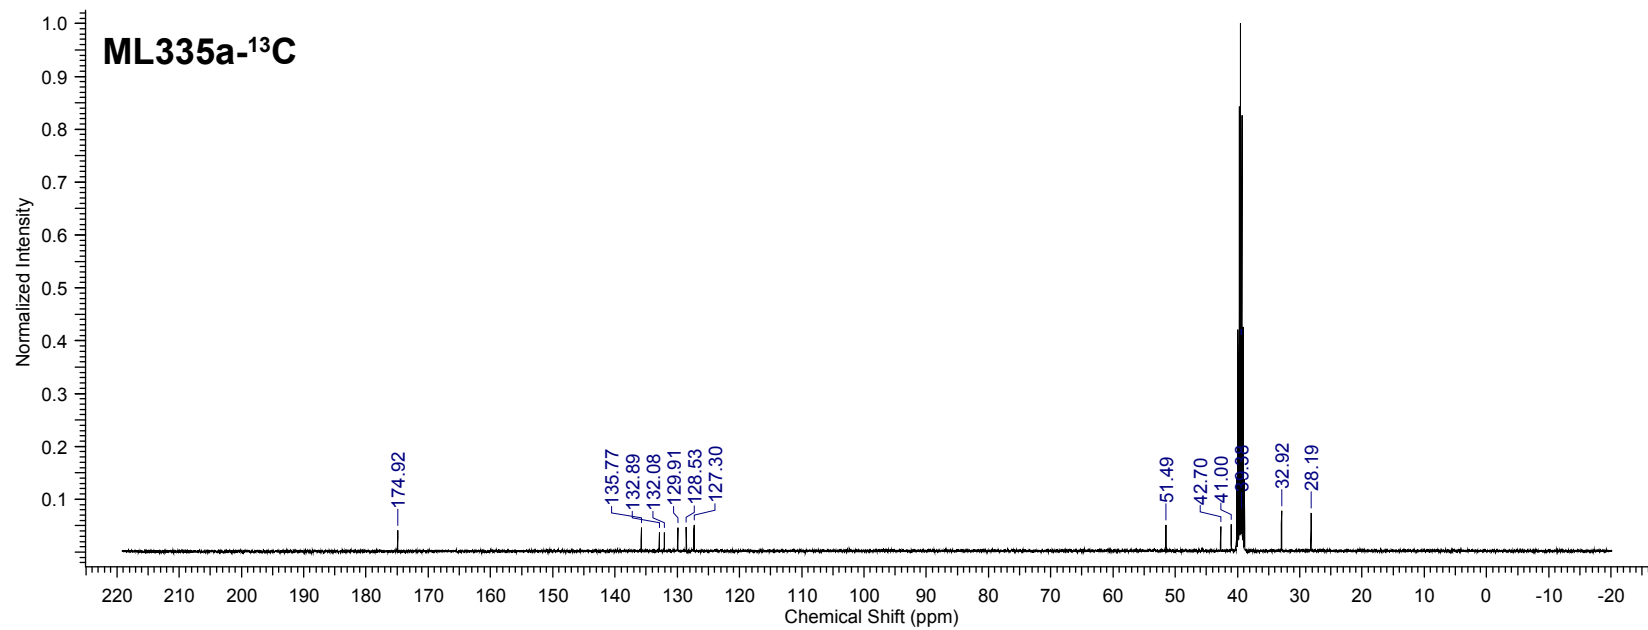

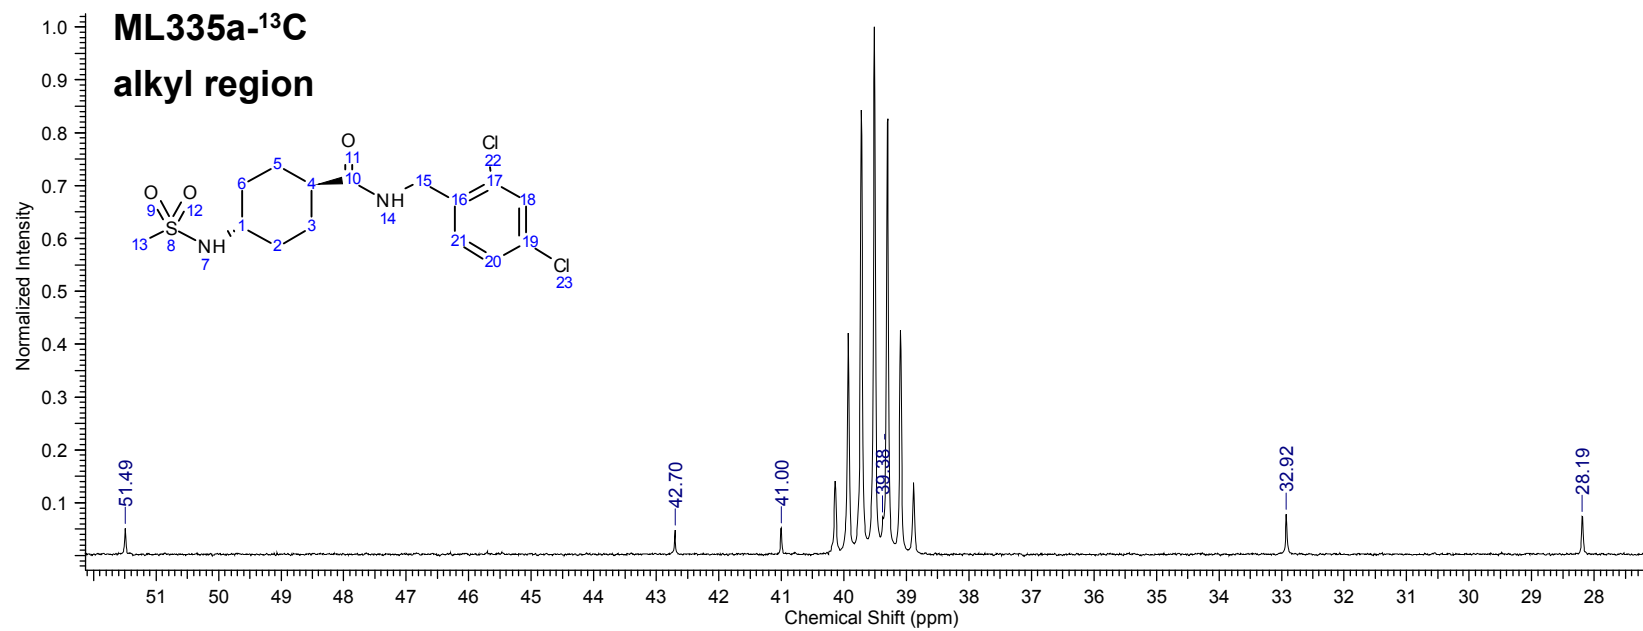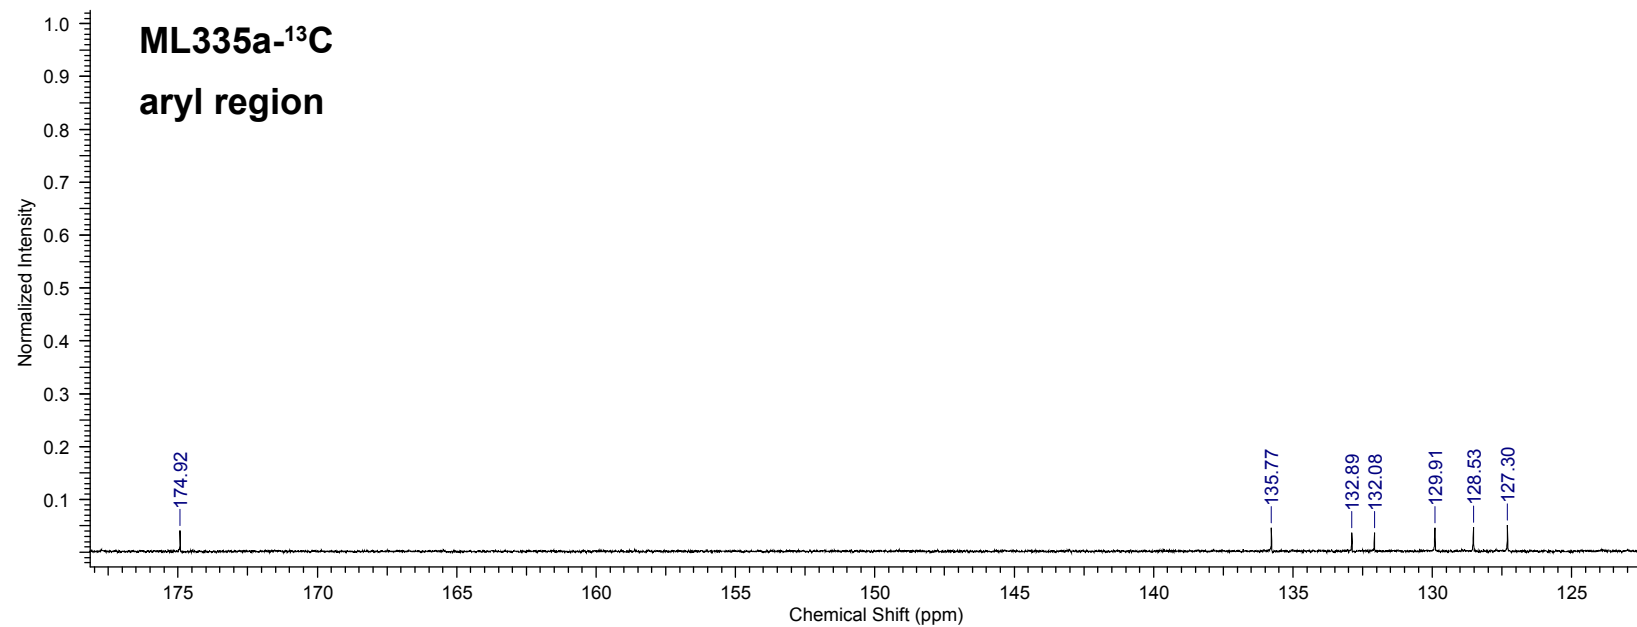

Supplement: NIHMS876351-supplement-1.pdf [file NIHMS876351-supplement-1.pdf]
